# Supplementary material for: Whole-Exome Sequencing Identifies a Novel Germline Variant in PTK7 Gene in Familial Colorectal Cancer
Source: Int J Mol Sci. 2022 Jan 24;23(3):1295. doi: 10.3390/ijms23031295 (PMC8836109; doi:10.3390/ijms23031295)
Supplement: Supplementary file 1 [file ijms-23-01295-s001.zip › ijms-1545025-supplementary.pdf]

## Supplementary Materials

**Supplementary Table S1.** List of qPCR primers

| Gene | Forward primer sequence                       | Reverse primer sequence |
|------|-----------------------------------------------|-------------------------|
| CREB | Quantitect primer assay purchased from Qiagen |                         |
| ERK  | ACACCAACCTCTCGTACATCGG                        | TGGCAGTAGGTCTGGTGCTCAA  |
| HPRT | Quantitect primer assay purchased from Qiagen |                         |
| p53  | Quantitect primer assay purchased from Qiagen |                         |
| PTK7 | GAGATGACGCTGGCAACTACAC                        | CGCTCTGGTTCCACTTTGAAGG  |
| P21  | Quantitect primer assay purchased from Qiagen |                         |

**Supplementary Table S2.** List of primary and secondary antibodies.

### PRIMARY ANTIBODIES

| Protein target     | Host   | Cat Number | Company                   | Dilution buffer     | Dilution factor |
|--------------------|--------|------------|---------------------------|---------------------|-----------------|
| pAKT (Ser473)      | Rabbit | 4060       | Cell Signaling Technology | 5% BSA in TBST      | 1:2000          |
| PanAKT             | Rabbit | 4691s      | Cell Signaling Technology | 5% milk in TBST     | 1:1000          |
| P21                | Rabbit | Ab109199   | Abcam                     | 5% milk BSA in TBST | 1:1000          |
| CREB               | Mouse  | 86B10      | Cell Signaling Technology | 5% milk in TBST     | 1:1000          |
| ERK                | Rabbit | 9102       | Cell Signaling Technology | 5% milk in TBST     | 1:1000          |
| GAPDH              | Mouse  | CB1001     | Millipore                 | 5% milk in TBST     | 1:3000          |
| Anti-alpha Tubulin | Rabbit | ab4074     | Abcam                     | 5% milk in TBST     | 1:1000          |

|                             |             |                       |                           |                        |                        |
|-----------------------------|-------------|-----------------------|---------------------------|------------------------|------------------------|
| <b>p53</b>                  | Mouse       | 1C12                  | Cell Signaling Technology | 5% milk in TBST        | 1:1000                 |
| <b>PTK7</b>                 | Goat        | AF4499                | Novus biologicals         | 5% BSA in TBST         | 1:200                  |
| <b>SECONDARY ANTIBODIES</b> |             |                       |                           |                        |                        |
| <b>Species reactivity</b>   | <b>Host</b> | <b>Catalog number</b> | <b>Company</b>            | <b>Dilution buffer</b> | <b>Dilution factor</b> |
| <b>Goat</b>                 | Donkey      | Sc-2020               | Santa Cruz Biotechnology  | 5% milk in TBST        | 1:5000                 |
| <b>Mouse</b>                | Horse       | 7076s                 | Cell Signaling Technology | 5% milk in TBST        | 1:5000                 |
| <b>Rabbit</b>               | Goat        | 7074s                 | Cell Signaling Technology | 5% milk in TBST        | 1:5000                 |

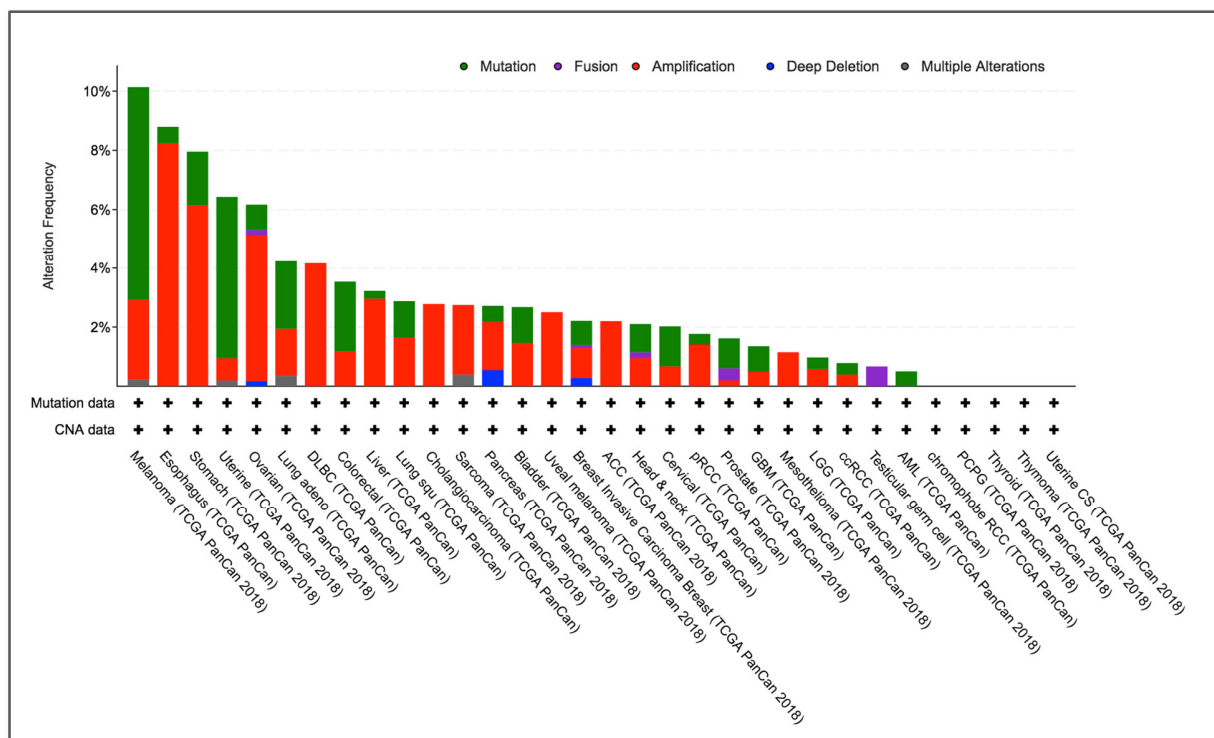

**Supplementary Figure S1.** PTK7 alterations in cancers. Histogram of alteration frequencies according to TCGA PanCancer data was extracted from cBioPortal ([www.cbioportal.org](http://www.cbioportal.org)) on 15th of March 2020.

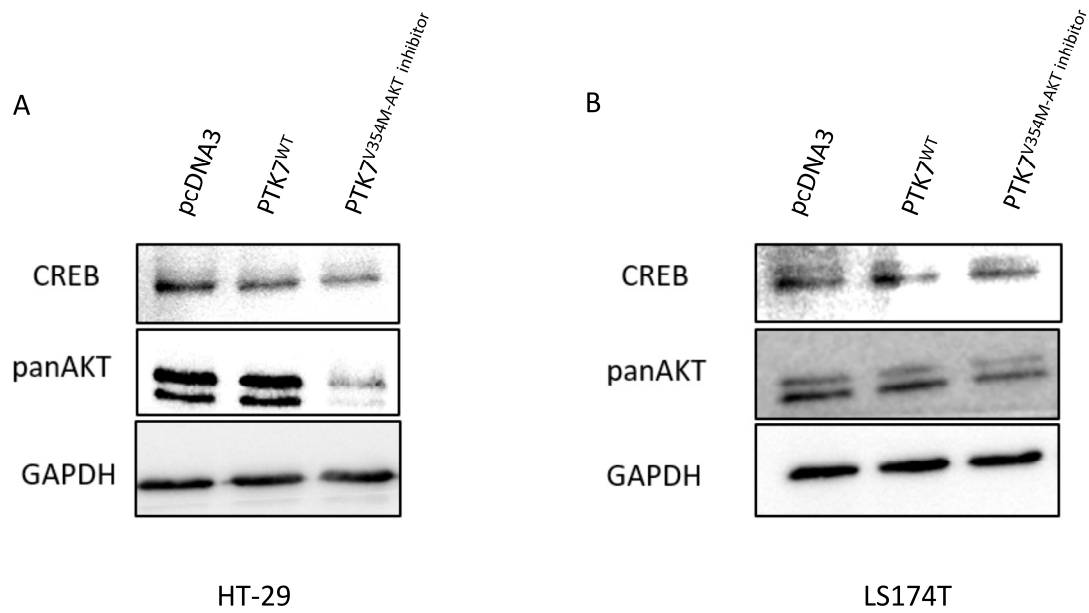

**Supplementary Figure S2. Effect of AKT inhibition on CREB expression in *PTK7V<sup>354M</sup>* variant**

Inhibition of AKT expression by using Perifosine did not rescue the CREB expression in (A) HT-29 and (B) LS174T cells transfected with *PTK7V<sup>354M</sup>*. AKT was inhibited successfully in both cell lines, but there was only a trend towards restoration of CREB in LS174T cells.

A

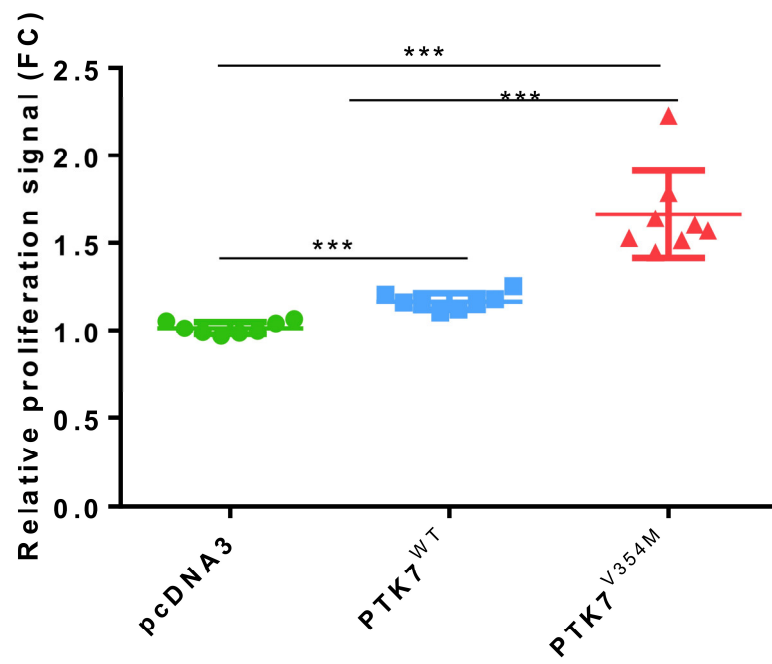

B

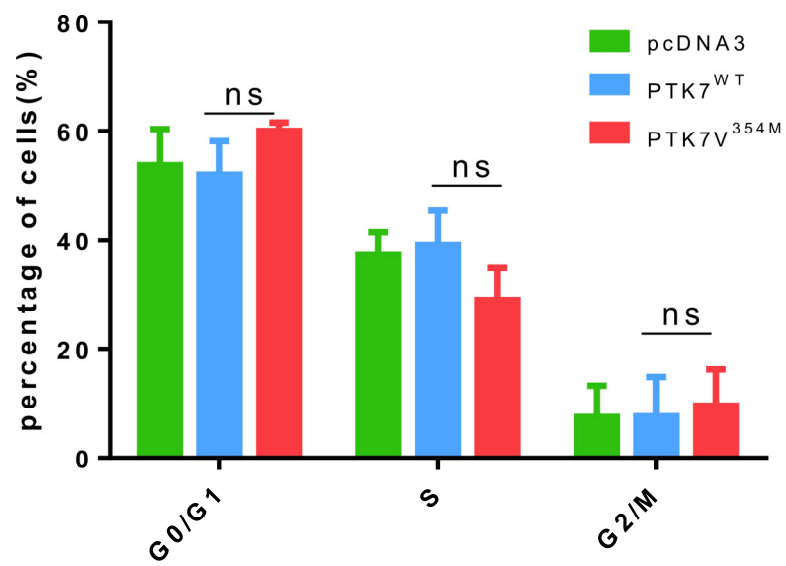

C

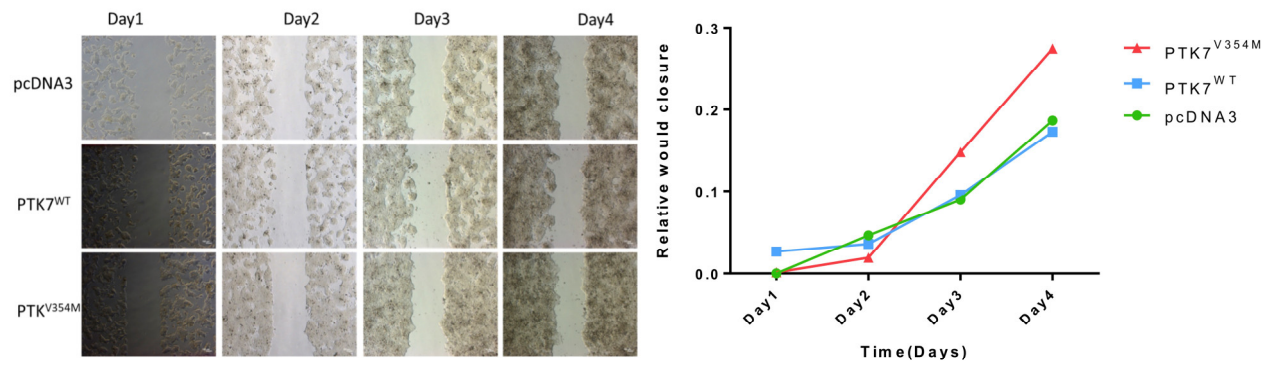

**Supplementary Figure S3. *PTK7<sup>V354M</sup>* variant increases cell proliferation, cell cycle progression and migration.** (A) Proliferation assay showed significantly increased viable cell numbers of LS174T-*PTK7<sup>V354M</sup>* compared to LS174T-*PTK7<sup>WT</sup>* cells. Significance levels are included for each time point. \*\*\* -  $p \leq 0.001$ . (B) LS174T *V354M* transfected cells resulted in significant cell cycle progression. (C) Representative image of migrated LS174T cells after overexpression of *PTK7<sup>WT</sup>* and LS174T-*PTK7<sup>V354M</sup>*.
